# Supplementary material for: Prenatal arsenic exposure is associated with increased plasma IGFBP3 concentrations in 9-year-old children partly via changes in DNA methylation
Source: PubMed Central journal article supplement (PMC6063321; doi:10.1007/s00204-018-2239-3), 2018-06-08
Supplement: 204_2018_2239_MOESM1_ESM.pdf [file 204_2018_2239_MOESM1_ESM.pdf]

## **SUPPLEMENTAL MATERIAL**

### **Prenatal arsenic exposure is associated with increased plasma IGFBP3 concentrations in 9-year-old children partly via changes in DNA methylation**

Anda R. Gliga<sup>1</sup>, Karin Engström<sup>2</sup>, Maria Kippler<sup>1</sup>, Helena Skröder<sup>1</sup>, Sultan Ahmed<sup>3</sup>, Marie Vahter<sup>1</sup>, Rubhana Raqib<sup>3</sup>, Karin Broberg<sup>1</sup>

<sup>1</sup>Unit of Metals and Health, Institute of Environmental Medicine, Karolinska Institutet, Stockholm, Sweden

<sup>2</sup>Division of Occupational and Environmental Medicine, Lund University, Lund, Sweden

<sup>3</sup>Division of Infectious Diseases, icddr,b, Dhaka, Bangladesh

## TABLE OF CONTENTS

|                       | page      |
|-----------------------|-----------|
| <b>Table S1.....</b>  | <b>3</b>  |
| <b>Table S2.....</b>  | <b>5</b>  |
| <b>Table S3.....</b>  | <b>6</b>  |
| <b>Table S4.....</b>  | <b>8</b>  |
| <b>Table S5.....</b>  | <b>9</b>  |
| <b>Table S6.....</b>  | <b>10</b> |
| <b>Figure S1.....</b> | <b>13</b> |

**Table S1.** Linear regression analysis of methylation of CpG sites within the *IGFBP3* gene in mononuclear cells at 9 years with IGFBP3 concentrations in plasma.<sup>a</sup>

| CpG        | Location in <i>IGFBP3</i> | All children (n=111)<br>β (95% CI); p-value | Boys (n=48)<br>β (95% CI); p-value | Girls (n=63)<br>β (95% CI); p-value |
|------------|---------------------------|---------------------------------------------|------------------------------------|-------------------------------------|
| cg16460681 | promoter                  | 56.88 (-30.05, 143.81); 0.197               | 101.30 (-51.00, 253.55); 0.187     | 41.62 (-65.30, 148.53); 0.439       |
| cg00419512 | promoter                  | -45.36 (-148.39, 56.78); 0.385              | -57.20 (-167.59, 166.45); 0.995    | -71.40 (-208.64, 65.84); 0.302      |
| cg00118103 | promoter                  | 75.77 (-41.99, 193.45); 0.205               | 65.36 (-124.92, 255.65); 0.492     | 82.02 (-70.21, 234.25); 0.285       |
| cg08541297 | promoter                  | 39.35 (-29.36, 108.07); 0.259               | -88.58 (-205.00, 27.84); 0.132     | 99.54 (16.11, 182.97); 0.0202       |
| cg04690927 | promoter                  | 64.99 (-36.28, 166.27); 0.206               | -52.57 (-202.76, 97.59); 0.484     | 152.00 (17.73, 286.32); 0.0272      |
| cg22403266 | promoter                  | 6.57 (-64.58, 77.72); 0.855                 | -15.89 (-125.95, 94.18); 0.772     | 19.15 (-76.41, 114.71); 0.689       |
| cg04727332 | promoter                  | 50.50 (-92.78, 193.78); 0.486               | 6.26 (-207.28, 219.81); 0.953      | 69.43 (-134.08, 272.94); 0.497      |
| cg04796162 | promoter                  | 12.11 (-38.50, 62.73); 0.636                | -26.09 (-100.62, 48.44); 0.484     | 40.08 (-31.59, 111.75); 0.267       |
| cg13977557 | promoter                  | 51.58 (-125.68, 229.43); 0.564              | 305.20 (26.82, 583.66); 0.0324     | -114.70 (-352.14, 122.79); 0.338    |
| cg12244052 | promoter                  | -15.22 (-63.31, 32.88); 0.532               | -63.58 (-143.57, 16.40); 0.116     | 7.25 (-55.85, 70.36); 0.819         |
| cg10094651 | promoter                  | 14.43 (-25.23, 54.10); 0.472                | -0.57 (-58.47, 57.33); 0.984       | 25.86 (-31.78, 83.50); 0.373        |
| cg05083496 | promoter                  | 8.84 (-26.97, 44.61); 0.626                 | 21.87 (-30.68, 74.43); 0.406       | -4.22 (-56.56, 48.11); 0.872        |
| cg23455440 | promoter                  | 26.35 (-34.28, 86.98); 0.391                | -12.56 (-125.97, 100.84); 0.824    | 44.27 (-31.08, 119.62); 0.245       |
| cg15208757 | promoter                  | 21.81 (-50.37, 94.00); 0.550                | -65.69 (-189.04, 57.66); 0.289     | 66.85 (-25.89, 159.58); 0.155       |
| cg24772240 | promoter                  | 4.03 (-53.26, 61.35); 0.889                 | -6.51 (-109.12, 96.10); 0.898      | 7.37 (-63.34, 78.09); 0.835         |
| cg07910986 | promoter                  | -5.35 (-82.45, 71.74); 0.891                | -24.61 (-139.93, 90.70); 0.669     | -3.00 (-114.96, 108.96); 0.957      |
| cg16447589 | promoter                  | -4.35 (-41.31, 32.60); 0.816                | -61.47 (-128.03, 5.08); 0.0694     | 21.65 (-24.27, 67.57); 0.349        |
| cg09619271 | promoter                  | 16.58 (-55.91, 89.07); 0.651                | -13.32 (-126.71, 100.08); 0.814    | 26.25 (-73.46, 125.95); 0.600       |
| cg19536059 | promoter                  | -9.87 (-89.18, 69.45); 0.806                | -59.00 (-179.20, 61.20); 0.328     | 16.95 (-93.84, 127.74); 0.761       |
| cg08831744 | promoter                  | 16.87 (-52.46, 86.22); 0.630                | -14.73 (-111.81, 82.35); 0.761     | 62.84 (-48.68, 174.37); 0.264       |
| cg20351904 | promoter                  | -10.88 (-122.55, 100.78); 0.847             | -130.10 (-307.77, 47.55); 0.147    | 59.52 (-96.40, 215.44); 0.448       |
| cg06789764 | promoter                  | 7.87 (-66.11, 81.86); 0.833                 | 118.20 (6.01, 230.34); 0.039       | -63.67 (-160.20, 32.85); 0.1919     |
| cg24901098 | promoter                  | -1.90 (-102.31, 98.50); 0.970               | -71.53 (-218.93, 75.87); 0.333     | 70.76 (-72.58, 214.10); 0.327       |
| cg10677697 | promoter                  | 2.60 (-89.00, 94.19); 0.955                 | 43.89 (-94.93, 182.70); 0.527      | -40.02 (-164.44, 84.39); 0.522      |
| cg22800581 | promoter                  | 32.23 (-119.92, 184.37); 0.675              | -73.40 (-300.11, 153.30); 0.517    | 128.50 (-86.62, 343.70); 0.237      |
| cg06713098 | promoter                  | 4.81 (-42.71, 52.35); 0.841                 | -21.41 (-93.66, 50.85); 0.554      | 24.19 (-40.37, 88.76); 0.456        |
| cg05867388 | promoter                  | -27.05 (-140.22, 86.12); 0.637              | 26.15 (-131.49, 183.81); 0.740     | -83.75 (-248.58, 81.09); 0.313      |
| cg26434048 | promoter                  | 3.52 (-34.91, 41.95); 0.856                 | -75.73 (-142.78, -8.67); 0.0278    | 35.12 (-11.05, 81.29); 0.133        |
| cg12902183 | intragenic                | -0.17 (-23.48, 23.14); 0.988                | 6.73 (-36.34, 49.82); 0.7541       | -0.40 (-30.19, 29.38); 0.979        |

|            |            |                                |                                 |                                |
|------------|------------|--------------------------------|---------------------------------|--------------------------------|
| cg16875425 | intragenic | 35.99 (0.85, 71.13); 0.0448    | 4.30 (-51.28, 59.88); 0.877     | 66.72 (20.10, 113.34); 0.0058  |
| cg03776080 | intragenic | 91.76 (32.54, 150.96); 0.0027  | -14.25 (-139.63, 111.13); 0.820 | 126.00 (60.86, 191.18); 0.0003 |
| cg23193639 | intragenic | 57.77 (-2.71, 118.25); 0.061   | 16.21 (-79.78, 112.22); 0.735   | 85.36 (4.76, 165.94); 0.0383   |
| cg22083798 | intragenic | 36.78 (1.47, 72.09); 0.0413    | 19.46 (-35.82, 74.75); 0.482    | 47.44 (-1.92, 96.80); 0.0592   |
| cg24942272 | intragenic | 96.77 (-23.00, 216.54); 0.112  | 13.08 (-177.09, 203.26); 0.890  | 13.87 (-24.26, 301.63); 0.938  |
| cg02120774 | intragenic | 80.50 (-7.14, 168.15); 0.0714  | -126.10 (-265.85, 13.72); 0.076 | 196.60 (91.29, 301.83); 0.0004 |
| cg11753867 | intragenic | 100.50 (-37.31, 238.25); 0.151 | 225.30 (6.80, 443.78); 0.0435   | 34.45 (-148.37, 217.28); 0.707 |
| cg20850023 | intragenic | 56.35 (-8.58, 121.29); 0.0882  | -38.52 (-144.96, 67.91); 0.470  | 12.31 (38.82, 207.31); 0.0049  |
| cg21268650 | intragenic | 43.59 (-14.26, 101.44); 0.138  | 30.67 (-60.77, 122.11); 0.503   | 54.43 (-24.27, 133.13); 0.172  |
| cg24381682 | intragenic | -65.91 (-147.94, 16.12); 0.114 | -73.32 (-212.58, 65.93); 0.294  | -66.10 (-173.32, 41.12); 0.222 |

<sup>a</sup> Methylation data was derived from the ComBat adjusted % methylation values (excluding sites from X and Y chromosomes for analysis on all children and including sites from X and Y chromosomes for the sex-stratified analysis). The linear models were adjusted for child sex (except when stratified for sex), estimated granulocytes and monocytes.

**Table S2.** Number of differentially methylated positions (DMPs) and differentially methylated regions (DMRs) in peripheral blood mononuclear cells at 9 years correlated with maternal urinary arsenic (GW 8, ln-transformed) or to IGFBP3 concentrations in plasma at 9 years.<sup>a</sup>

|                 | Prenatal arsenic | IGFBP3 | Overlap Top 2000 |
|-----------------|------------------|--------|------------------|
| <b>#DMPs</b>    |                  |        |                  |
| All (n=112/111) | 9                | 0      | 14               |
| Boys (n=49/48)  | 57               | 1162   | 11               |
| Girls (n=63/63) | 15               | 11     | 11               |
| <b>#DMRs</b>    |                  |        |                  |
| All (n=112/111) | 42               | 45     | 10               |
| Boys (n=49/48)  | 39               | 109    | 26               |
| Girls (n=63/63) | 12               | 262    | 5                |

<sup>a</sup>DMPs for which q values < 0.05 (FDR adjusted p-values) are considered as differentially methylated. The differential methylation was performed using linear models for microarray data (*limma* package), adjusted for sex (unless stratified for sex), estimated granulocytes and monocytes. The overlap between the two analyses was performed considering the top 2000 differentially methylated sites. DMRs were generated using the *bumphunter* function within the *minfi* package. The overlap between the two analyses was performed considering both complete and partial region overlap. n, number of children for which the differential methylation analysis was performed

**Table S3.** Differentially mediated CpG sites in peripheral blood mononuclear cells at 9 years in relation to maternal urinary As (GW 8, In-transformed)<sup>a</sup>

|                    | ID         | Chr | Gene symbol               | Prenatal arsenic |         |       |
|--------------------|------------|-----|---------------------------|------------------|---------|-------|
|                    |            |     |                           | $\beta$          | p       | q     |
| <b>ALL (n=112)</b> |            |     |                           |                  |         |       |
|                    | cg01718785 | 7   | <i>PTPRN2</i>             | 0.239            | < 0.001 | 0.013 |
|                    | cg14855326 | 10  | <i>BTRC</i>               | 0.470            | < 0.001 | 0.024 |
|                    | cg14525832 | 14  | <i>ALKBH1 (C14orf156)</i> | -0.333           | < 0.001 | 0.037 |
|                    | cg09652472 | 7   | <i>KIAA1908</i>           | 0.104            | < 0.001 | 0.037 |
|                    | cg20565833 | 4   | <i>FAM190A</i>            | 0.198            | < 0.001 | 0.049 |
|                    | cg15491540 | 20  | <i>SPTLC3</i>             | 0.297            | < 0.001 | 0.049 |
|                    | cg04848823 | 16  | NA                        | 0.206            | < 0.001 | 0.049 |
|                    | cg08452525 | 10  | <i>C10orf18</i>           | -0.254           | < 0.001 | 0.049 |
|                    | cg22922226 | 14  | <i>C14orf132</i>          | 0.099            | < 0.001 | 0.049 |
| <b>BOYS (n=49)</b> |            |     |                           |                  |         |       |
|                    | cg09857273 | 8   | <i>CDH17</i>              | 0.215            | < 0.001 | 0.004 |
|                    | cg04933829 | 14  | NA                        | 0.259            | < 0.001 | 0.004 |
|                    | cg16052901 | 6   | <i>VPS52 (RPS18)</i>      | 0.199            | < 0.001 | 0.004 |
|                    | cg12535476 | 6   | <i>BMP5</i>               | 0.224            | < 0.001 | 0.006 |
|                    | cg15778745 | 13  | <i>SLITRK5</i>            | -0.463           | < 0.001 | 0.006 |
|                    | cg23202738 | 3   | <i>C3orf15</i>            | -0.220           | < 0.001 | 0.006 |
|                    | cg13002167 | 7   | NA                        | 0.212            | < 0.001 | 0.006 |
|                    | cg21003654 | 4   | <i>JAKMIP1</i>            | -0.136           | < 0.001 | 0.006 |
|                    | cg23500924 | 5   | NA                        | 0.286            | < 0.001 | 0.006 |
|                    | cg00298324 | 20  | <i>FAM110A</i>            | -0.194           | < 0.001 | 0.006 |
|                    | cg23085143 | 7   | <i>SVOPL</i>              | -0.350           | < 0.001 | 0.006 |
|                    | cg01609139 | 4   | NA                        | -0.460           | < 0.001 | 0.006 |
|                    | cg05658107 | 4   | <i>RHOH</i>               | -0.393           | < 0.001 | 0.013 |
|                    | cg21222426 | 9   | NA                        | -0.288           | < 0.001 | 0.016 |
|                    | cg07520506 | 12  | <i>CD163L1</i>            | -0.343           | < 0.001 | 0.018 |
|                    | cg14855326 | 10  | <i>BTRC</i>               | 0.489            | < 0.001 | 0.018 |
|                    | cg16447589 | 7   | <i>IGFBP3</i>             | -0.239           | < 0.001 | 0.020 |
|                    | cg06241901 | 6   | <i>TTBK1</i>              | -0.127           | < 0.001 | 0.021 |
|                    | cg20610452 | 2   | NA                        | -0.175           | < 0.001 | 0.021 |
|                    | cg01567825 | 7   | <i>DOCK4</i>              | -0.228           | < 0.001 | 0.021 |
|                    | cg05371749 | 16  | <i>ITPRIPL2</i>           | -0.175           | < 0.001 | 0.021 |
|                    | cg02818189 | 1   | NA                        | -0.204           | < 0.001 | 0.022 |
|                    | cg03735888 | 19  | <i>ZNF132</i>             | -0.321           | < 0.001 | 0.024 |
|                    | cg18899777 | 8   | <i>GRHL2</i>              | -0.218           | < 0.001 | 0.024 |
|                    | cg18806997 | 1   | <i>SNORD46 (RPS8)</i>     | 0.172            | < 0.001 | 0.024 |
|                    | cg01015123 | 3   | <i>OTOL1</i>              | 0.209            | < 0.001 | 0.025 |
|                    | cg14439249 | 6   | NA                        | 0.193            | < 0.001 | 0.025 |
|                    | cg16332700 | 10  | <i>GPR123</i>             | 0.134            | < 0.001 | 0.025 |
|                    | cg13308137 | 11  | <i>CUGBP1</i>             | -0.165           | < 0.001 | 0.025 |
|                    | cg24789682 | 4   | NA                        | 0.211            | < 0.001 | 0.025 |
|                    | cg13906874 | 11  | NA                        | 0.426            | < 0.001 | 0.025 |
|                    | cg17519280 | 5   | <i>ATG12</i>              | 0.240            | < 0.001 | 0.028 |
|                    | cg10599444 | 14  | <i>MMP14</i>              | -0.114           | < 0.001 | 0.030 |
|                    | cg04634427 | 15  | NA                        | -0.284           | < 0.001 | 0.030 |
|                    | cg06984073 | 5   | <i>SV2C</i>               | -0.197           | < 0.001 | 0.030 |
|                    | cg21548021 | 8   | NA                        | 0.237            | < 0.001 | 0.033 |
|                    | cg12127706 | 11  | <i>CTTN</i>               | -0.192           | < 0.001 | 0.033 |
|                    | cg11793332 | 13  | <i>ELF1</i>               | -0.195           | < 0.001 | 0.033 |
|                    | cg10215401 | 8   | NA                        | -0.236           | < 0.001 | 0.033 |
|                    | cg11299264 | 19  | NA                        | -0.124           | < 0.001 | 0.033 |
|                    | cg20963741 | 13  | NA                        | -0.119           | < 0.001 | 0.033 |
|                    | cg24246628 | 6   | <i>KIF25</i>              | -0.502           | < 0.001 | 0.033 |

|                     |    |                     |        |         |       |  |
|---------------------|----|---------------------|--------|---------|-------|--|
| cg11414507          | 12 | NA                  | -0.123 | < 0.001 | 0.033 |  |
| cg17852326          | 1  | HLX                 | 0.112  | < 0.001 | 0.038 |  |
| cg03839794          | 14 | NPAS3               | -0.513 | < 0.001 | 0.042 |  |
| cg22707529          | 6  | PHACTR2             | -0.178 | < 0.001 | 0.043 |  |
| cg23326536          | 13 | EDNRB               | 0.203  | < 0.001 | 0.043 |  |
| cg08918658          | 6  | SYNJ2               | -0.144 | < 0.001 | 0.043 |  |
| cg20187049          | 3  | NA                  | 0.195  | < 0.001 | 0.043 |  |
| cg01834305          | 5  | AACSL               | 0.172  | < 0.001 | 0.045 |  |
| cg00478710          | 3  | NA                  | -0.111 | < 0.001 | 0.045 |  |
| cg03960811          | 2  | ZNF385B             | 0.298  | < 0.001 | 0.048 |  |
| cg25621286          | 5  | NA                  | 0.134  | < 0.001 | 0.049 |  |
| cg01913577          | 1  | NA                  | 0.194  | < 0.001 | 0.050 |  |
| cg20705392          | 17 | NTN1                | -0.152 | < 0.001 | 0.050 |  |
| cg00320288          | 16 | NA                  | -0.112 | < 0.001 | 0.050 |  |
| cg15310415          | 6  | NA                  | 0.477  | < 0.001 | 0.050 |  |
| <b>GIRLS (n=63)</b> |    |                     |        |         |       |  |
| cg15576338          | 1  | NA                  | 0.213  | < 0.001 | 0.005 |  |
| cg14525832          | 14 | ALKBH1 (C14orf156)  | -0.468 | < 0.001 | 0.013 |  |
| cg20009461          | 17 | FOKK2               | 0.279  | < 0.001 | 0.013 |  |
| cg03169856          | 8  | FER1L6              | 0.265  | < 0.001 | 0.013 |  |
| cg22139563          | 17 | KRT38               | 0.300  | < 0.001 | 0.013 |  |
| cg15487992          | 19 | UBL5                | -0.268 | < 0.001 | 0.013 |  |
| cg00804031          | 19 | PIAS4               | -0.416 | < 0.001 | 0.013 |  |
| cg13753209          | 17 | CLTC                | -0.244 | < 0.001 | 0.013 |  |
| cg03426602          | 2  | NA                  | 0.243  | < 0.001 | 0.016 |  |
| cg21725754          | 4  | NAF1                | -0.376 | < 0.001 | 0.017 |  |
| cg04575016          | 3  | C3orf64             | -0.213 | < 0.001 | 0.023 |  |
| cg20608709          | 15 | ADAM10              | 0.516  | < 0.001 | 0.027 |  |
| cg21101726          | 1  | REN                 | 0.262  | < 0.001 | 0.033 |  |
| cg25311330          | 1  | TMEM183A (TMEM183B) | -0.498 | < 0.001 | 0.043 |  |
| cg16105461          | 11 | DAGLA               | 0.118  | < 0.001 | 0.048 |  |

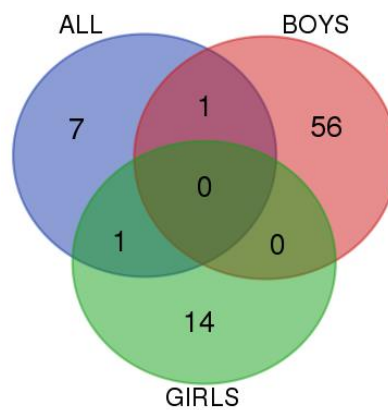

Lower insert is a Venn diagram indicating the number of overlapping CpGs between all individuals, boys and girls

<sup>a</sup> $\beta$  – linear regression estimates from the differential methylation analysis adjusted for sex (unless stratified for sex), estimated granulocytes and monocytes; input data were ComBat adjusted M-values; q – FDR-adjusted p-value

**Table S4.** Differentially methylated positions in peripheral blood mononuclear cells at 9 years in relation to maternal urinary As (GW 8, In-transformed) and plasma IGFBP3 concentrations<sup>a</sup>

| Top 2000 overlap |            |     |          |                         | Prenatal As |         |       | IGFBP3 |         |       |
|------------------|------------|-----|----------|-------------------------|-------------|---------|-------|--------|---------|-------|
|                  | ID         | Chr | Gene     | Location                | Dir.        | p       | q     | Dir.   | p       | q     |
| <b>ALL</b>       |            |     |          |                         |             |         |       |        |         |       |
|                  | cg00150520 | 1   | RNF220   | intragenic              | +           | < 0.005 | 0.435 | +      | < 0.005 | 0.454 |
|                  | cg02250992 | 12  | SCARB1   | intragenic              | +           | < 0.005 | 0.450 | +      | < 0.005 | 0.371 |
|                  | cg02824980 | 19  | CYP4F12  | promoter                | +           | < 0.005 | 0.493 | +      | < 0.005 | 0.401 |
|                  | cg04912993 | 3   | ALCAM    | intragenic              | +           | < 0.005 | 0.450 | +      | < 0.005 | 0.287 |
|                  | cg04961397 | 16  | SETD1A   | intragenic              | +           | < 0.005 | 0.426 | +      | < 0.005 | 0.421 |
|                  | cg08292120 | 21  | NA       | intergenic              | +           | < 0.005 | 0.401 | +      | < 0.005 | 0.312 |
|                  | cg08570472 | 2   | GAREML   | intragenic              | +           | < 0.005 | 0.511 | +      | < 0.005 | 0.362 |
|                  | cg10716835 | 10  | CYP26A1  | intragenic              | +           | < 0.005 | 0.433 | +      | < 0.005 | 0.329 |
|                  | cg10856894 | 6   | PDE10A   | intragenic              | +           | < 0.005 | 0.513 | -      | < 0.005 | 0.362 |
|                  | cg13316171 | 2   | ZC3H15   | promoter                | +           | < 0.005 | 0.519 | +      | < 0.005 | 0.402 |
|                  | cg23713249 | 7   | GIMAP1   | intragenic              | +           | < 0.005 | 0.528 | +      | < 0.005 | 0.395 |
|                  | cg24312661 | 15  | SEMA4B   | promoter                | +           | < 0.005 | 0.472 | +      | < 0.005 | 0.464 |
|                  | cg26144999 | 13  | NA       | intergenic              | +           | < 0.005 | 0.411 | -      | < 0.005 | 0.371 |
|                  | cg26163223 | 1   | MUL1     | promoter                | +           | < 0.005 | 0.467 | +      | < 0.005 | 0.419 |
| <b>BOYS</b>      |            |     |          |                         |             |         |       |        |         |       |
|                  | cg01441988 | 22  | KIAA0930 | intragenic              | -           | < 0.005 | 0.262 | -      | < 0.005 | 0.036 |
|                  | cg01929855 | 4   | JAKMIP1  | intragenic              | -           | < 0.005 | 0.243 | -      | < 0.005 | 0.050 |
|                  | cg06507551 | 7   | CTTNBP2  | promoter                | -           | < 0.005 | 0.215 | -      | < 0.005 | 0.058 |
|                  | cg12844324 | 8   | CHD7     | intragenic              | -           | < 0.005 | 0.197 | -      | < 0.005 | 0.058 |
|                  | cg12849291 | 2   | SEMA4C   | promoter                | +           | < 0.005 | 0.205 | +      | < 0.005 | 0.066 |
|                  | cg14075624 | 6   | C6orf136 | intragenic              | +           | < 0.005 | 0.272 | +      | < 0.005 | 0.032 |
|                  | cg14622879 | 6   | NA       | intergenic              | +           | < 0.005 | 0.246 | +      | < 0.005 | 0.041 |
|                  | cg16420756 | 6   | NA       | intergenic              | -           | < 0.005 | 0.267 | -      | < 0.005 | 0.045 |
|                  | cg22193726 | 12  | PTPN11   | intragenic              | +           | < 0.005 | 0.208 | +      | < 0.005 | 0.028 |
|                  | cg22778120 | 22  | PRR5     | intragenic              | -           | < 0.005 | 0.248 | -      | < 0.005 | 0.034 |
|                  | cg24712249 | 1   | SYT11    | intragenic,<br>promoter | +           | < 0.005 | 0.192 | +      | < 0.005 | 0.049 |
| <b>GIRLS</b>     |            |     |          |                         |             |         |       |        |         |       |
|                  | cg01528321 | 10  | TSPAN14  | intragenic              | -           | < 0.005 | 0.339 | +      | < 0.005 | 0.349 |
|                  | cg02057681 | 3   | CHL1     | intragenic              | +           | < 0.005 | 0.455 | -      | < 0.005 | 0.327 |
|                  | cg14185808 | 2   | MRPS9    | promoter                | -           | < 0.005 | 0.484 | +      | < 0.005 | 0.316 |
|                  | cg15450139 | 12  | ARHGDI3  | promoter                | -           | < 0.005 | 0.352 | +      | < 0.005 | 0.214 |
|                  | cg16758084 | 3   | CACNA2D3 | 3'UTR                   | +           | < 0.005 | 0.191 | -      | < 0.005 | 0.353 |
|                  | cg18326022 | 17  | ITGB4    | intragenic,<br>promoter | +           | < 0.005 | 0.431 | +      | < 0.005 | 0.363 |
|                  | cg22016716 | 6   | SUPT3H   | intragenic              | +           | < 0.005 | 0.453 | -      | < 0.005 | 0.344 |
|                  | cg24336278 | 1   | TP73     | promoter                | -           | < 0.005 | 0.169 | +      | < 0.005 | 0.327 |
|                  | cg26144999 | 13  | NA       | intergenic              | +           | < 0.005 | 0.399 | -      | < 0.005 | 0.269 |
|                  | cg26612156 | 13  | NA       | intergenic              | -           | < 0.005 | 0.463 | +      | < 0.005 | 0.247 |
|                  | cg26810336 | X   | IL1RAPL1 | promoter                | +           | < 0.005 | 0.385 | +      | < 0.005 | 0.339 |

<sup>a</sup>Table contains the overlaps from the top 2000 DMPs for the two analyses. The differential methylation analysis was adjusted for sex (unless stratified for sex), estimated granulocytes and monocytes; input data were ComBat-adjusted M-values; Dir. refers to the direction of the association; q – FDR-adjusted p-value



**Table S5. Mediation regression analyses<sup>a</sup>**

| Top 2000 overlap                  |            |      |                 |            | Prenatal As versus IGFBP3 (9 years) |       | % Mediation |
|-----------------------------------|------------|------|-----------------|------------|-------------------------------------|-------|-------------|
| ID                                | Chr        | Gene | Location        | $\beta$    | p-value                             |       |             |
| <b>ALL (n=524) study sample</b>   |            |      |                 |            |                                     |       |             |
| MVA model                         |            |      |                 |            | 76                                  | 0.009 |             |
| <b>ALL (n=110) EWAS sub-set</b>   |            |      |                 |            |                                     |       |             |
| MVA model                         |            |      |                 |            | 85                                  | 0.257 |             |
| MVA model +                       | cg00150520 | 1    | <i>RNF220</i>   | intragenic | 28                                  | 0.702 | 67%         |
| +                                 | cg02250992 | 12   | <i>SCARB1</i>   | intragenic | 46                                  | 0.539 | 46%         |
| +                                 | cg02824980 | 19   | <i>CYP4F12</i>  | promoter   | 37                                  | 0.622 | 56%         |
| +                                 | cg04912993 | 3    | <i>ALCAM</i>    | intragenic | 43                                  | 0.577 | 49%         |
| +                                 | cg04961397 | 16   | <i>SETD1A</i>   | intragenic | 23                                  | 0.769 | 73%         |
| +                                 | cg08292120 | 21   | NA              | intergenic | 34                                  | 0.643 | 60%         |
| +                                 | cg08570472 | 2    | <i>GAREML</i>   | intragenic | 45                                  | 0.548 | 47%         |
| +                                 | cg10716835 | 10   | <i>CYP26A1</i>  | intragenic | 24                                  | 0.744 | 72%         |
| +                                 | cg10856894 | 6    | <i>PDE10A</i>   | intragenic | 152                                 | 0.047 | -79%        |
| +                                 | cg13316171 | 2    | <i>ZC3H15</i>   | promoter   | 31                                  | 0.668 | 64%         |
| +                                 | cg23713249 | 7    | <i>GIMAP1</i>   | intragenic | 34                                  | 0.661 | 60%         |
| +                                 | cg24312661 | 15   | <i>SEMA4B</i>   | promoter   | 36                                  | 0.638 | 58%         |
| +                                 | cg26144999 | 13   | NA              | intergenic | 125                                 | 0.097 | -47%        |
| +                                 | cg26163223 | 1    | <i>MUL1</i>     | promoter   | 14                                  | 0.849 | 84%         |
| <b>BOYS (n=261) study sample</b>  |            |      |                 |            |                                     |       |             |
| MVA model                         |            |      |                 |            | 85                                  | 0.024 |             |
| <b>BOYS (n=47) EWAS sub-set</b>   |            |      |                 |            |                                     |       |             |
| MVA model                         |            |      |                 |            | 152                                 | 0.188 |             |
| MVA model +                       | cg01441988 | 22   | <i>KIAA0930</i> | intragenic | 32                                  | 0.762 | 79%         |
| +                                 | cg01929855 | 4    | <i>JAKMIP1</i>  | intragenic | 51                                  | 0.654 | 66%         |
| +                                 | cg06507551 | 7    | <i>CTTNBP2</i>  | promoter   | 94                                  | 0.397 | 38%         |
| +                                 | cg12844324 | 8    | <i>CHD7</i>     | intragenic | 61                                  | 0.604 | 60%         |
| +                                 | cg12849291 | 2    | <i>SEMA4C</i>   | promoter   | 78                                  | 0.464 | 49%         |
| +                                 | cg14075624 | 6    | <i>C6orf136</i> | intragenic | 79                                  | 0.44  | 48%         |
| +                                 | cg14622879 | 6    | NA              | intergenic | 72                                  | 0.507 | 53%         |
| +                                 | cg16420756 | 6    | NA              | intergenic | 46                                  | 0.668 | 70%         |
| +                                 | cg22193726 | 12   | <i>PTPN11</i>   | intragenic | 23                                  | 0.842 | 85%         |
| +                                 | cg22778120 | 22   | <i>PRR5</i>     | intragenic | 80                                  | 0.456 | 47%         |
| +                                 | cg24712249 | 1    | <i>SYT11</i>    | promoter   | 16                                  | 0.89  | 89%         |
| +                                 | cg16447589 | 7    | <i>IGFBP3</i>   | promoter   | 121                                 | 0.311 | 20%         |
| <b>GIRLS (n=263) study sample</b> |            |      |                 |            |                                     |       |             |
| MVA model                         |            |      |                 |            | 76                                  | 0.082 |             |
| <b>GIRLS (n=63) EWAS sub-set</b>  |            |      |                 |            |                                     |       |             |
| MVA model                         |            |      |                 |            | 11                                  | 0.918 |             |

<sup>a</sup>Linear regression analysis maternal urinary As (GW 8, ln-transformed) with plasma IGF1 (9 years) on the sub-set of individuals for which methylation analysis was performed. In the multi-variable adjusted model (MVA) we considered child sex (except when stratified for sex), plasma CRP (9 years) and plasma IGF1 as covariates. In addition, we evaluated the effect of potential epigenetic mediators by adding them one by one (ComBat-adjusted % methylation) as covariates in the MVA regression model. The mediator variables were identified from the top 2000 CpG sites that were associated both with the exposure (ln transformed As in urine, GW8) and the outcome (IGFBP3 ng/mL 9 years) in the respective differential methylation EWAS analyses. For boys we tested an additional potential mediator (cg16447589) identified on the promoter region of the *IGFBP3*. % mediation was calculated as  $(\beta_{(MVA)} - \beta_{(MVA+\%methylationCpG)})/\beta_{(MVA)}$ . The mediation analysis could not be performed for girls due to the low estimates in the EWAS sub-set compared to the whole sample.

**Table S6.** Differentially mediated regions in peripheral blood mononuclear cells at 9 years in relation to maternal urinary As (GW 8, In-transformed)<sup>a</sup>

| Prenatal As |     |             |           |           |    |      |         |         |
|-------------|-----|-------------|-----------|-----------|----|------|---------|---------|
|             | Chr | Gene symbol | Start     | End       | L  | Dir. | p-value | q-value |
| <b>ALL</b>  |     |             |           |           |    |      |         |         |
|             | 5   | MIR886      | 135415693 | 135416613 | 16 | +    | 0.001   | 0.318   |
|             | 22  | GSTT1       | 24384105  | 24384573  | 11 | -    | 0.001   | 0.318   |
|             | 17  | SLFN12      | 33759484  | 33760419  | 12 | +    | 0.002   | 0.364   |
|             | 6   | NA          | 29648271  | 29649084  | 20 | -    | 0.003   | 0.364   |
|             | 17  | ALOX12      | 6899085   | 6899758   | 12 | -    | 0.005   | 0.364   |
|             | 5   | FLJ44606    | 126408756 | 126409372 | 11 | -    | 0.005   | 0.364   |
|             | 5   | RUFY1       | 178986131 | 178986906 | 9  | +    | 0.007   | 0.364   |
|             | 6   | PSMB9       | 32822911  | 32823292  | 4  | +    | 0.008   | 0.364   |
|             | 11  | CALCA       | 14993378  | 14994045  | 13 | -    | 0.009   | 0.364   |
|             | 6   | NA          | 28601269  | 28601477  | 12 | +    | 0.009   | 0.364   |
|             | 16  | ABAT        | 8806531   | 8807018   | 10 | -    | 0.010   | 0.364   |
|             | 11  | C11orf21    | 2322500   | 2322935   | 13 | -    | 0.010   | 0.364   |
|             | 1   | NA          | 152161237 | 152162025 | 7  | -    | 0.011   | 0.364   |
|             | 5   | PCDHB7      | 140552347 | 140552600 | 4  | +    | 0.014   | 0.366   |
|             | 1   | OR2L13      | 248100345 | 248100614 | 7  | -    | 0.015   | 0.366   |
|             | 1   | NA          | 147781827 | 147782558 | 7  | +    | 0.017   | 0.374   |
|             | 3   | PLOD2       | 145879568 | 145879710 | 5  | -    | 0.020   | 0.395   |
|             | 1   | PM20D1      | 205818956 | 205819492 | 7  | +    | 0.021   | 0.395   |
|             | 10  | FGFR2       | 123355268 | 123356236 | 7  | -    | 0.022   | 0.395   |
|             | 22  | C22orf27    | 31318103  | 31318546  | 9  | -    | 0.024   | 0.395   |
|             | 5   | NA          | 1867978   | 1868639   | 5  | +    | 0.025   | 0.395   |
|             | 17  | LOC728392   | 5402972   | 5403516   | 5  | -    | 0.026   | 0.395   |
|             | 7   | NA          | 21208923  | 21209781  | 7  | -    | 0.027   | 0.395   |
|             | 19  | AURKC       | 57742217  | 57742444  | 8  | +    | 0.028   | 0.395   |
|             | 12  | NA          | 89748726  | 89748932  | 4  | +    | 0.028   | 0.395   |
|             | 7   | PON1        | 94953770  | 94954202  | 7  | +    | 0.029   | 0.395   |
|             | 16  | CLDN9       | 3062349   | 3062975   | 8  | -    | 0.030   | 0.395   |
|             | 11  | LDHC        | 18433564  | 18433887  | 5  | -    | 0.031   | 0.395   |
|             | 6   | TNXB        | 32064491  | 32064656  | 9  | -    | 0.033   | 0.406   |
|             | 4   | NPFFR2      | 72897565  | 72897868  | 5  | -    | 0.034   | 0.406   |
|             | 1   | S100A13     | 153599671 | 153600156 | 6  | +    | 0.037   | 0.406   |
|             | 4   | JAKMIP1     | 6107021   | 6107649   | 7  | -    | 0.038   | 0.406   |
|             | 11  | WT1         | 32449163  | 32450104  | 7  | -    | 0.039   | 0.406   |
|             | 5   | CDX1        | 149546331 | 149546946 | 8  | -    | 0.039   | 0.406   |
|             | 5   | SLC25A2     | 140683467 | 140683772 | 8  | -    | 0.040   | 0.406   |
|             | 2   | DPP10       | 115419537 | 115420053 | 5  | -    | 0.040   | 0.406   |
|             | 11  | NA          | 67383377  | 67383862  | 7  | +    | 0.040   | 0.406   |
|             | 6   | NA          | 164506861 | 164507305 | 6  | -    | 0.041   | 0.406   |
|             | 4   | GABRG1      | 46126066  | 46126448  | 7  | -    | 0.041   | 0.406   |
|             | 4   | NA          | 4763259   | 4763372   | 4  | -    | 0.045   | 0.411   |
|             | 6   | VPS52/RPS18 | 33240820  | 33241770  | 8  | +    | 0.047   | 0.411   |
|             | 11  | CHORDC1     | 89956704  | 89957033  | 5  | -    | 0.049   | 0.411   |
| <b>BOYS</b> |     |             |           |           |    |      |         |         |
|             | 5   | MIR886      | 135415693 | 135416613 | 16 | +    | 0.000   | 0.222   |

|              |    |                 |           |           |    |   |       |       |
|--------------|----|-----------------|-----------|-----------|----|---|-------|-------|
|              | 6  | TNXB            | 32063901  | 32064785  | 29 | - | 0.001 | 0.255 |
|              | X  | BCYRN1          | 70712215  | 70712810  | 8  | + | 0.002 | 0.346 |
|              | 22 | GSTT1           | 24384105  | 24384573  | 11 | - | 0.003 | 0.456 |
|              | 6  | NA11            | 31650735  | 31651291  | 20 | - | 0.003 | 0.456 |
|              | X  | NDUFB11/RBM10   | 47004051  | 47005131  | 18 | + | 0.006 | 0.534 |
|              | 6  | NA1             | 29648379  | 29649084  | 15 | - | 0.008 | 0.534 |
|              | X  | IKBKG           | 153775262 | 153776009 | 16 | + | 0.010 | 0.534 |
|              | 17 | SLFN12          | 33759484  | 33760419  | 12 | + | 0.013 | 0.534 |
|              | X  | RNF113A         | 119005413 | 119006122 | 14 | + | 0.014 | 0.534 |
|              | X  | ZNF674          | 46404528  | 46405125  | 14 | + | 0.015 | 0.534 |
|              | 5  | PCDHB16         | 140562562 | 140563400 | 7  | + | 0.015 | 0.534 |
|              | 5  | FLJ44606        | 126408756 | 126409372 | 11 | - | 0.016 | 0.534 |
|              | X  | UPF3B           | 118986897 | 118987328 | 13 | + | 0.019 | 0.534 |
|              | X  | LOC100272228    | 149106454 | 149107029 | 13 | + | 0.021 | 0.534 |
|              | 5  | PCDHB11         | 140578896 | 140579644 | 9  | + | 0.024 | 0.534 |
|              | 17 | LOC728392       | 5402972   | 5403516   | 5  | - | 0.025 | 0.534 |
|              | 2  | LCLAT1          | 30669597  | 30669952  | 5  | + | 0.025 | 0.534 |
|              | X  | TAZ/DNASE1L1    | 153639778 | 153640967 | 12 | + | 0.026 | 0.534 |
|              | X  | HMGB3           | 150151580 | 150151823 | 11 | + | 0.029 | 0.534 |
|              | 2  | DPP10           | 115419537 | 115420053 | 5  | - | 0.035 | 0.534 |
|              | X  | RPL36A          | 100645695 | 100646162 | 11 | + | 0.037 | 0.534 |
|              | X  | FAM104B         | 55187242  | 55187903  | 11 | + | 0.037 | 0.534 |
|              | X  | CLCN5           | 49687028  | 49687610  | 11 | + | 0.037 | 0.534 |
|              | X  | PGK1            | 77359355  | 77359749  | 11 | + | 0.038 | 0.534 |
|              | 5  | PCDHGA2         | 140718731 | 140719302 | 5  | + | 0.039 | 0.534 |
|              | 5  | PCDHB7          | 140552347 | 140552600 | 4  | + | 0.039 | 0.534 |
|              | X  | ACSL4           | 108976035 | 108976893 | 10 | + | 0.039 | 0.534 |
|              | X  | NUP62CL/CXorf41 | 106449457 | 106449904 | 11 | + | 0.040 | 0.534 |
|              | X  | YIPF6           | 67718299  | 67719066  | 11 | + | 0.041 | 0.534 |
|              | X  | MSL3            | 11776256  | 11776935  | 8  | + | 0.041 | 0.534 |
|              | X  | ZNF182/SPACA5   | 47862977  | 47863707  | 11 | + | 0.042 | 0.534 |
|              | X  | KIF4A           | 69509686  | 69510172  | 11 | + | 0.042 | 0.534 |
|              | X  | ATP6AP1         | 153656771 | 153657411 | 9  | + | 0.044 | 0.534 |
|              | X  | SYP             | 49056505  | 49056886  | 10 | + | 0.044 | 0.534 |
|              | X  | TSPYL2          | 53111116  | 53112003  | 10 | + | 0.044 | 0.534 |
|              | X  | EDA             | 68835678  | 68836202  | 10 | + | 0.044 | 0.534 |
|              | X  | PPP1R3F         | 49126087  | 49126486  | 9  | + | 0.046 | 0.534 |
|              | X  | LONRF3          | 118108506 | 118109413 | 10 | + | 0.047 | 0.534 |
| <b>GIRLS</b> |    |                 |           |           |    |   |       |       |
|              | 22 | GSTT1           | 24384105  | 24384573  | 11 | - | 0.009 | 0.617 |
|              | 6  | NA              | 31650735  | 31651094  | 14 | + | 0.010 | 0.617 |
|              | 1  | OR2L13          | 248100276 | 248100614 | 8  | - | 0.011 | 0.617 |
|              | 17 | ALOX12          | 6899207   | 6899758   | 10 | - | 0.013 | 0.617 |
|              | 1  | NA              | 152161237 | 152162025 | 7  | - | 0.015 | 0.617 |
|              | X  | HTATSF1         | 135578793 | 135579487 | 13 | + | 0.018 | 0.617 |
|              | 19 | HKR1            | 37825388  | 37825679  | 4  | + | 0.028 | 0.617 |
|              | 12 | SLC38A4         | 47219626  | 47219958  | 11 | - | 0.028 | 0.617 |
|              | X  | XIAP            | 122993695 | 122994071 | 11 | + | 0.032 | 0.617 |
|              | 5  | RUFY1           | 178986131 | 178986906 | 9  | + | 0.035 | 0.617 |
|              | 6  | PSMB9           | 32822911  | 32823292  | 4  | + | 0.036 | 0.617 |

|   |     |           |           |   |   |       |       |
|---|-----|-----------|-----------|---|---|-------|-------|
| 5 | FER | 108083455 | 108083695 | 4 | + | 0.045 | 0.617 |
|---|-----|-----------|-----------|---|---|-------|-------|

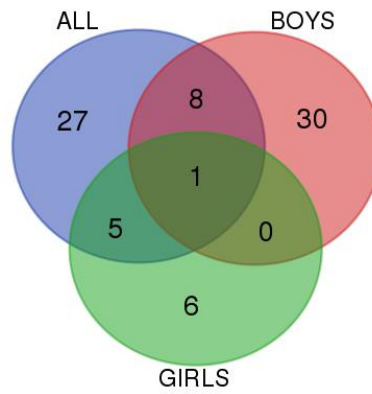

lower insert is a Venn diagram indicating the number of overlapping DMRs between all individuals, boys and girls

<sup>a</sup>*Start* and *End* are chromosomal coordinates according to genome built 37; *L*, number of CpG sites within the DMR; *q*-value, FDR-adjusted *p*-value; *Dir*, direction of association with Prenatal As

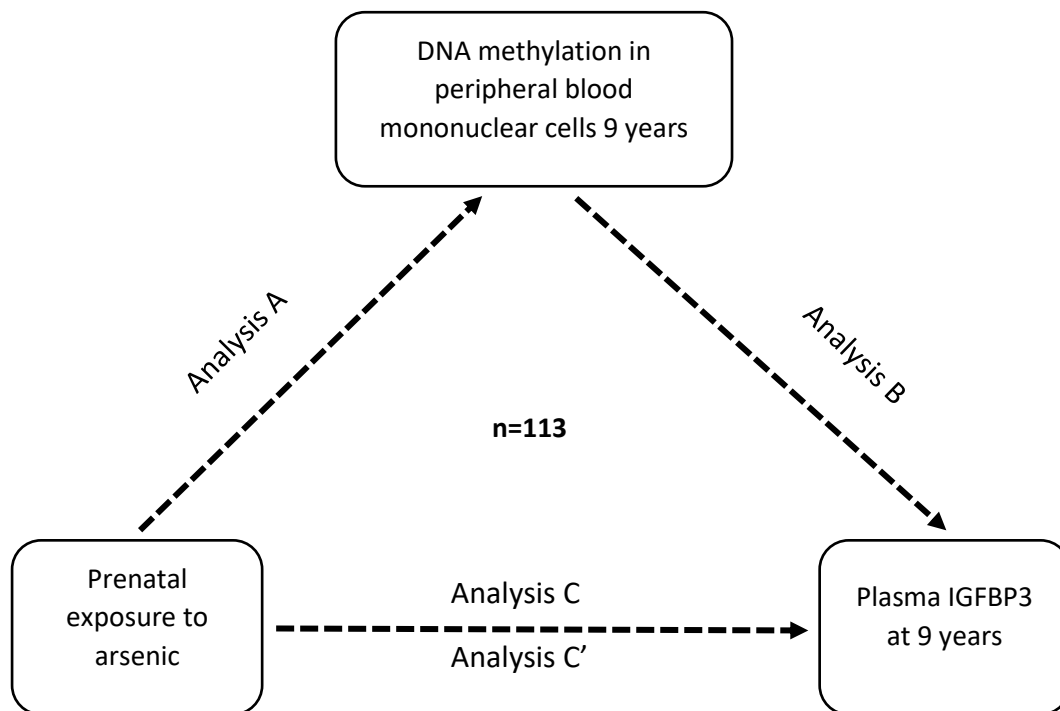

**Figure S1. Mediation model**

Analysis A evaluates the effect estimate of the association between prenatal exposure to arsenic and DNA methylation of CpG sites expressed as Combat-adjusted % methylation and Combat-adjusted M-values. Linear models were adjusted for child sex (except when stratified for sex), estimated granulocytes and monocytes. See Table 3 and Table S4.

Analysis B evaluates the effect estimate of the association between DNA methylation of CpG sites (expressed as Combat-adjusted % methylation and Combat-adjusted M-values) and plasma IGFBP3 concentrations. Linear models were adjusted for child sex (except when stratified for sex), estimated granulocytes and monocytes. See Table S1 and Table S4.

Analysis C evaluates the effect estimate of the association between prenatal exposure to arsenic and plasma concentrations of IGFBP3 at 9 years. Linear models were adjusted for child sex (except when stratified for sex), plasma CRP (9 years) and plasma IGF1. See Table S5.

Analysis C' evaluates the effect estimate of the association between prenatal exposure to arsenic and plasma concentrations of IGFBP3 at 9 years when the mediator is included as covariate. Linear models were adjusted similarly as for analysis C and, in addition, for DNA methylation of CpG sites of interest (one by one, expressed as Combat-adjusted % methylation values). See Table S5.
